# Supplementary material
Source: publisher figshare collection journal article supplement (https://gsajournals.figshare.com/ndownloader/files/24096152)
Supplement: Supplementary file 1 [file 24096152]

Gene	FixedCisRegulatoryDiffs	FixedNSynDiffs
FBgn0012710	1	3
FBgn0070158	NA	NA
FBgn0070187	NA	NA
FBgn0070238	5	4
FBgn0070269	NA	NA
FBgn0070390	NA	NA
FBgn0070391	NA	NA
FBgn0070427	NA	NA
FBgn0070472	NA	1
FBgn0070495	NA	2
FBgn0070522	NA	2
FBgn0070532	1	NA
FBgn0070540	NA	NA
FBgn0070594	NA	NA
FBgn0070630	NA	3
FBgn0070646	56	3
FBgn0070686	NA	1
FBgn0070743	NA	NA
FBgn0071029	NA	NA
FBgn0071035	NA	2
FBgn0071054	NA	3
FBgn0071083	48	5
FBgn0071175	NA	NA
FBgn0071393	NA	NA
FBgn0071399	41	1
FBgn0071442	NA	NA
FBgn0071468	73	2
FBgn0071482	NA	NA
FBgn0071518	NA	NA
FBgn0071558	27	6
FBgn0071595	NA	NA
FBgn0072044	NA	1
FBgn0072099	NA	1
FBgn0072199	NA	NA
FBgn0072204	3	NA
FBgn0072362	NA	NA
FBgn0072498	13	NA
FBgn0072511	NA	NA
FBgn0072586	1	NA
FBgn0072651	NA	1
FBgn0072656	NA	NA
FBgn0072658	NA	1
FBgn0072670	NA	5
FBgn0072674	NA	NA
FBgn0072677	NA	1
FBgn0072830	NA	2
FBgn0072853	NA	NA
FBgn0073118	NA	NA
FBgn0073163	NA	NA
FBgn0073316	NA	NA
FBgn0073458	NA	NA
FBgn0074031	NA	NA
FBgn0074312	NA	NA
FBgn0074313	NA	NA
FBgn0074315	NA	NA
FBgn0074849	NA	NA
FBgn0074850	NA	1
FBgn0074925	NA	NA
FBgn0075073	NA	NA
FBgn0075178	2	18
FBgn0075267	NA	1
FBgn0075317	NA	16
FBgn0075392	NA	5
FBgn0075448	NA	NA
FBgn0076669	5	NA
FBgn0076720	13	NA
FBgn0076736	117	6
FBgn0076754	NA	10
FBgn0076771	12	NA
FBgn0076803	NA	1
FBgn0076833	NA	NA
FBgn0076834	10	1
FBgn0076893	NA	NA
FBgn0076898	NA	NA
FBgn0076916	NA	6
FBgn0076925	1	NA
FBgn0076932	44	1
FBgn0076935	NA	NA
FBgn0076936	NA	NA
FBgn0076954	1	NA
FBgn0077424	NA	1
FBgn0077431	NA	NA
FBgn0077460	NA	1
FBgn0077641	NA	NA
FBgn0077704	2	4
FBgn0077730	40	17
FBgn0077782	NA	2
FBgn0077943	NA	NA
FBgn0078078	NA	6
FBgn0078144	NA	NA
FBgn0078196	NA	NA
FBgn0078201	NA	1
FBgn0078297	NA	NA
FBgn0078341	1	2
FBgn0078690	NA	NA
FBgn0078699	NA	NA
FBgn0078928	NA	NA
FBgn0078933	2	13
FBgn0078959	NA	NA
FBgn0078975	NA	NA
FBgn0079009	31	NA
FBgn0079041	1	4
FBgn0079197	NA	2
FBgn0079207	1	NA
FBgn0079260	NA	8
FBgn0079270	NA	NA
FBgn0079338	NA	3
FBgn0079341	NA	6
FBgn0079390	NA	1
FBgn0079502	1	3
FBgn0079543	NA	2
FBgn0079595	4	3
FBgn0079717	NA	NA
FBgn0079807	32	NA
FBgn0079887	NA	2
FBgn0079890	NA	NA
FBgn0079902	NA	NA
FBgn0079924	NA	2
FBgn0079974	NA	NA
FBgn0080056	NA	NA
FBgn0080139	NA	7
FBgn0080141	NA	NA
FBgn0080142	13	6
FBgn0080159	NA	NA
FBgn0080216	NA	NA
FBgn0080276	15	1
FBgn0080278	NA	NA
FBgn0080294	NA	NA
FBgn0080295	NA	6
FBgn0080301	NA	2
FBgn0080319	1	1
FBgn0080324	NA	NA
FBgn0080353	1	NA
FBgn0080364	NA	2
FBgn0080383	NA	8
FBgn0080393	NA	3
FBgn0080404	NA	NA
FBgn0080427	NA	1
FBgn0080428	NA	NA
FBgn0080442	NA	NA
FBgn0080689	NA	1
FBgn0080703	2	1
FBgn0080723	NA	2
FBgn0080746	1	6
FBgn0080763	NA	NA
FBgn0080772	NA	1
FBgn0080794	NA	1
FBgn0080943	NA	NA
FBgn0080962	NA	NA
FBgn0081136	NA	NA
FBgn0081287	NA	NA
FBgn0081414	NA	2
FBgn0081561	NA	NA
FBgn0081638	NA	NA
FBgn0081762	1	NA
FBgn0081779	NA	NA
FBgn0082126	1	3
FBgn0243549	NA	NA
FBgn0243802	NA	NA
FBgn0244112	NA	NA
FBgn0244357	NA	NA
FBgn0244410	NA	NA
FBgn0244758	4	2
FBgn0244819	NA	2
FBgn0244821	NA	NA
FBgn0244825	NA	1
FBgn0244851	NA	NA
FBgn0244862	NA	6
FBgn0244868	NA	NA
FBgn0244898	NA	NA
FBgn0244903	NA	NA
FBgn0244906	NA	3
FBgn0244909	NA	NA
FBgn0244920	NA	2
FBgn0244927	NA	NA
FBgn0244933	NA	2
FBgn0244937	NA	2
FBgn0244939	NA	NA
FBgn0244962	2	7
FBgn0244968	NA	NA
FBgn0245004	3	1
FBgn0245018	NA	NA
FBgn0245033	NA	NA
FBgn0245058	NA	2
FBgn0245065	NA	4
FBgn0245072	NA	3
FBgn0245079	NA	NA
FBgn0245081	NA	1
FBgn0245088	NA	2
FBgn0245091	NA	NA
FBgn0245135	NA	9
FBgn0245140	NA	NA
FBgn0245152	NA	1
FBgn0245168	NA	NA
FBgn0245170	NA	NA
FBgn0245171	NA	1
FBgn0245178	NA	1
FBgn0245219	NA	4
FBgn0245246	NA	NA
FBgn0245252	NA	NA
FBgn0245259	NA	NA
FBgn0245279	NA	NA
FBgn0245316	NA	NA
FBgn0245327	NA	2
FBgn0245328	NA	7
FBgn0245335	NA	NA
FBgn0245339	NA	NA
FBgn0245363	NA	NA
FBgn0245720	NA	8
FBgn0245853	NA	NA
FBgn0245857	NA	4
FBgn0245916	NA	5
FBgn0246018	NA	2
FBgn0246023	48	1
FBgn0246054	4	18
FBgn0246165	NA	NA
FBgn0249562	NA	NA
FBgn0249565	NA	1
FBgn0249566	NA	2
FBgn0249605	NA	NA
FBgn0249608	NA	NA
FBgn0249618	NA	14
FBgn0249674	NA	NA
FBgn0249678	NA	1
FBgn0249681	5	5
FBgn0249682	2	2
FBgn0249690	36	1
FBgn0249723	NA	NA
FBgn0249745	NA	1
FBgn0249750	NA	1
FBgn0249754	1	13
FBgn0249761	NA	1
FBgn0249775	2	9
FBgn0249779	NA	NA
FBgn0249781	82	NA
FBgn0249783	NA	1
FBgn0249806	NA	2
FBgn0249818	NA	NA
FBgn0249820	NA	NA
FBgn0249854	NA	NA
FBgn0249861	NA	4
FBgn0249874	NA	NA
FBgn0249886	NA	6
FBgn0249912	NA	2
FBgn0249921	NA	1
FBgn0249933	NA	4
FBgn0249936	NA	NA
FBgn0249956	NA	1
FBgn0249965	NA	5
FBgn0250001	NA	2
FBgn0250004	NA	2
FBgn0250017	NA	2
FBgn0250664	2	3
FBgn0250671	NA	NA
FBgn0261712	NA	NA
FBgn0270947	NA	NA
FBgn0270996	NA	NA
FBgn0271061	NA	NA
FBgn0271083	NA	NA
FBgn0271119	NA	NA
FBgn0271136	NA	NA
FBgn0271148	NA	NA
FBgn0271321	NA	NA
FBgn0271344	NA	NA
FBgn0271364	NA	NA
FBgn0271443	NA	NA
FBgn0271458	NA	NA
FBgn0271469	NA	NA
FBgn0271582	NA	NA
FBgn0271636	NA	NA
FBgn0271644	NA	NA
FBgn0271737	NA	NA
FBgn0271840	NA	NA
FBgn0271869	NA	NA
FBgn0271873	NA	NA
FBgn0272072	NA	NA
FBgn0272099	NA	NA
FBgn0272161	NA	NA
FBgn0272162	NA	NA
FBgn0272218	NA	NA
FBgn0272390	NA	NA
FBgn0272404	NA	NA
FBgn0272478	NA	NA
FBgn0272525	NA	NA
FBgn0272536	NA	NA
FBgn0272559	NA	NA
FBgn0272607	NA	NA
FBgn0272933	NA	NA
FBgn0272934	NA	NA
FBgn0273009	NA	NA
FBgn0273059	NA	NA
FBgn0273409	NA	NA
